# Supplementary material for: The response of fine root morphological and physiological traits to added nitrogen in Schrenk’s spruce (Picea schrenkiana) of the Tianshan mountains, China
Source: PeerJ. 2019 Dec 4;7:e8194. doi: 10.7717/peerj.8194 (PMC6898987; doi:10.7717/peerj.8194)
Supplement: Supplemental Information 1 [file peerj-07-8194-s001.xlsx]

## Sheet: Sheet1
number	srl(m.g-1)	sra(g.cm-2)	rtd(g.cm-3)	RDMC(g.cm-3)
NO10cM(<1mm)	0.575151	25.672	1.09667	0.599
NO20cM(<1mm)	0.569944	25.0775	1.10427	0.92328
NO30cM(<1mm)	0.571814	25.5953	1.12838	0.667389
NO40cM(<1mm)	0.573278	24.5804	0.962557	0.876652
NO50cM(<1mm)	0.573211	25.1309	1.54741	0.80291
NO60cM(<1mm)	0.568573	24.9154	1.1705	0.807692
	0.571995	25.1619	1.1683	0.779487
NO10cM(1-1.5mm)	0.737011	34.4682	0.779465	0.748549
NO20cM(1-1.5mm)	0.786766	33.5124	0.782333	0.893107
NO30cM(1-1.5mm)	0.744853	34.0873	0.986815	0.806236
NO40cM(1-1.5mm)	0.749031	35.3851	1.0856	0.936737
NO50cM(1-1.5mm)	0.767849	33.5741	1.07137	0.864831
NO60cM(1-1.5mm)	0.703909	33.0525	1.25183	0.890394
	0.748237	34.0133	0.992901	0.856642
NO10cM(1.5-2mm)	0.347301	17.8628	1.36779	0.916153
NO20cM(1.5-2mm)	0.348974	17.4026	1.43738	0.924516
NO30cM(1.5-2mm)	0.341113	24.9739	1.44598	0.880052
NO40cM(1.5-2mm)	0.343991	25.289	1.53233	0.883073
NO50cM(1.5-2mm)	0.342195	17.0518	1.57461	0.93617
NO60cM(1.5-2mm)	0.3457	16.7014	1.6265	0.8208
	0.344879	19.8803	1.49743	0.893461
N110cM(<1mm)	0.545325	15.2182	2.96068	0.854992
N120cM(<1mm)	0.535214	14.1826	2.92446	0.842678
N130cM(<1mm)	0.552358	14.7053	3.01197	0.625284
N140cM(<1mm)	0.563972	14.4614	2.68397	0.84472
N150cM(<1mm)	0.552248	13.936	2.59688	0.808511
N160cM(<1mm)	0.531492	16.3424	2.63589	0.938815
	0.546768	14.8077	2.80231	0.819167
N110cM(1-1.5mm)	0.403048	15.4727	2.11502	0.862823
N120cM(1-1.5mm)	0.40296	14.9869	2.15229	0.87788
N130cM(1-1.5mm)	0.399493	16.9279	2.0125	0.854886
N140cM(1-1.5mm)	0.429225	14.1069	1.83844	0.827048
N150cM(1-1.5mm)	0.391727	14.8499	2.43594	0.916118
N160cM(1-1.5mm)	0.388765	13.9509	2.49454	0.814241
	0.402536	15.0492	2.17479	0.858833
N110cM(1.5-2mm)	0.584196	20.7316	1.7085	0.903974
N120cM(1.5-2mm)	0.614615	20.5466	1.86484	0.948681
N130cM(1.5-2mm)	0.589957	21.3877	1.44014	0.48076
N140cM(1.5-2mm)	0.652655	22.1686	2.25478	0.845687
N150cM(1.5-2mm)	0.552448	20.8974	2.36662	0.842984
N160cM(1.5-2mm)	0.559415	20.5458	2.26373	0.954323
	0.592214	21.0463	1.9831	0.829401
N210cM(<1mm)	0.938851	23.4797	2.13937	0.745887
N220cM(<1mm)	0.932056	20.4252	2.39524	0.864899
N230cM(<1mm)	0.886884	25.4377	2.3296	0.861033
N240cM(<1mm)	0.939169	25.9501	2.05215	0.90239
N250cM(<1mm)	0.947924	19.1635	2.09027	0.893805
N260cM(<1mm)	1.02599	20.7158	1.98609	0.938433
	0.945146	22.5286	2.16545	0.867741
N210cM(1-1.5mm)	0.824334	29.5459	1.18682	0.911728
N220cM(1-1.5mm)	0.798137	28.0792	1.29689	0.902795
N230cM(1-1.5mm)	0.871584	27.5806	1.17307	0.917355
N240cM(1-1.5mm)	0.892134	27.1135	1.18616	0.795775
N250cM(1-1.5mm)	0.841791	26.8089	1.2351	0.858166
N260cM(1-1.5mm)	0.925066	27.1133	1.15459	0.809237
	0.858841	27.7069	1.20544	0.865843
N210cM(1.5-2mm)	0.371751	27.4885	0.618245	0.789678
N220cM(1.5-2mm)	0.370454	27.4823	0.715985	0.902533
N230cM(1.5-2mm)	0.378461	27.2159	0.66898	0.857708
N240cM(1.5-2mm)	0.366816	26.9809	0.572702	0.861204
N250cM(1.5-2mm)	0.364455	28.3974	0.711167	0.898273
N260cM(1.5-2mm)	0.357043	28.1195	0.752426	0.806641
	0.368163	27.6141	0.673251	0.852673
N310cM(<1mm)	0.506387	17.2482	2.13937	0.896066
N320cM(<1mm)	0.507817	16.7249	2.56656	0.958882
N330cM(<1mm)	0.515712	16.2381	2.03209	0.810127
N340cM(<1mm)	0.512674	15.6777	2.26311	0.860981
N350cM(<1mm)	0.507228	15.8197	2.26316	0.879653
N360cM(<1mm)	0.507398	15.5067	2.40518	0.827529
	0.509536	16.2026	2.27825	0.872206
N310cM(1-1.5mm)	0.778191	35.8518	0.760773	0.861552
N320cM(1-1.5mm)	0.773076	32.7682	0.813565	0.748322
N330cM(1-1.5mm)	0.791899	34.9384	0.840823	0.845113
N340cM(1-1.5mm)	0.809282	33.4141	0.712046	0.874372
N350cM(1-1.5mm)	0.845088	32.8801	0.712786	0.837476
N360cM(1-1.5mm)	0.79658	35.5763	0.729094	0.975062
	0.799019	34.2381	0.761514	0.856983
N310cM(1.5-2mm)	0.435676	21.6478	1.16839	0.809574
N320cM(1.5-2mm)	0.366788	21.3974	1.43521	0.918489
N330cM(1.5-2mm)	0.442734	21.2582	1.07344	0.860632
N340cM(1.5-2mm)	0.440313	20.9046	0.810338	0.849398
N350cM(1.5-2mm)	0.451886	22.1695	1.74614	0.852941
N360cM(1.5-2mm)	0.380808	22.5214	1.41633	0.9
	0.419701	21.6498	1.27498	0.865172
