# Supplementary material for: The response of fine root morphological and physiological traits to added nitrogen in Schrenk’s spruce (Picea schrenkiana) of the Tianshan mountains, China
Source: PeerJ. 2019 Dec 4;7:e8194. doi: 10.7717/peerj.8194 (PMC6898987; doi:10.7717/peerj.8194)
Supplement: Supplemental Information 2 [file peerj-07-8194-s002.xlsx]

## Sheet: Sheet1
number	SS（ug/g）	SP(ug/g)	FRV(ug//g)	FP(ug/g)	MDA(ug/g)	TWC(%)
NO10cM(<1mm)	3.15764	1.69152	56.0563	4.06664	26.0175	66.9448
NO20cM(<1mm)	1.48623	2.75814	60.2817	4.05032	25.6962	51.8072
NO30cM(<1mm)	2.7018	2.77969	68.7324	3.99422	20.5562	49.8377
NO40cM(<1mm)	1.628	2.21944	55.7746	4.02584	20.5562	46.5116
NO50cM(<1mm)	1.5812	2.16557	44.9296	4.06664	19.2712	24.547
NO60cM(<1mm)	1.498	1.64304	42.1127	4.0799	18.95	23.8095
NO10cM(1-1.5mm)	6.22982	2.96824	51.6901	4.57562	22.1826	33.5917
NO20cM(1-1.5mm)	8.23837	2.95746	56.0563	4.391	22.6036	44.2363
NO30cM(1-1.5mm)	6.97056	2.97901	54.6479	4.3553	19.4874	24.0331
NO40cM(1-1.5mm)	10.0712	2.6504	55.7746	4.3655	16.582	21.1022
NO50cM(1-1.5mm)	16.0826	2.59115	41.831	4.3757	16.513	15.6295
NO60cM(1-1.5mm)	15.5656	2.21944	35.2113	4.53686	12.9793	12.3098
NO10cM(1.5-2mm)	6.67616	3.16217	50.4225	4.6766	30.197	28.3267
NO20cM(1.5-2mm)	8.48528	3.1891	52.9577	4.53074	28.912	25.7097
NO30cM(1.5-2mm)	5.09022	3.14601	55.7746	4.32266	25.4745	20.1504
NO40cM(1.5-2mm)	4.69136	3.12985	46.0563	4.51136	25.1963	13.2409
NO50cM(1.5-2mm)	2.00855	3.03288	37.6056	4.61132	19.0926	10.7417
NO60cM(1.5-2mm)	1.9879	2.80663	30.2817	4.6409	13.6165	10.3922
N110cM(<1mm)	6.76163	2.50495	59.7183	4.55216	24.7325	36.8914
N120cM(<1mm)	7.56885	2.49957	61.4085	4.54298	23.7688	58.3913
N130cM(<1mm)	6.1301	2.6504	69.1549	4.5185	19.9138	59.9274
N140cM(<1mm)	2.12726	2.75814	52.2535	4.5593	16.0587	18.3824
N150cM(<1mm)	6.78063	2.69889	47.7465	4.56542	15.7375	23.6842
N160cM(<1mm)	5.689	2.37567	43.662	4.53278	15.095	6.51731
N110cM(1-1.5mm)	7.9867	2.64502	59.0141	4.44812	19.2914	46.6374
N120cM(1-1.5mm)	4.7151	2.62347	61.4085	4.44812	18.4274	41.8301
N130cM(1-1.5mm)	3.51377	2.61808	68.7324	4.4318	17.2386	51.6166
N140cM(1-1.5mm)	4.93827	3.02211	49.5775	4.44812	17.2245	20.9119
N150cM(1-1.5mm)	1.68091	3.15139	43.9437	4.4675	16.1917	27.1095
N160cM(1-1.5mm)	8.39031	2.65579	39.1549	4.55624	12.0155	22.8137
N110cM(1.5-2mm)	18.2669	2.78508	54.3662	4.69496	29.8895	38.0952
N120cM(1.5-2mm)	11.7474	2.76353	58.169	4.60112	27.8219	23.0313
N130cM(1.5-2mm)	1.85185	3.3561	65.0704	4.62152	24.58	36.8673
N140cM(1.5-2mm)	2.62583	2.83356	56.4789	4.5083	24.9169	18.2471
N150cM(1.5-2mm)	16.4862	2.99517	41.9718	4.65824	18.841	18.6262
N160cM(1.5-2mm)	5.90218	2.99517	33.9437	4.55624	10.8215	4.78632
N210cM(<1mm)	3.585	2.94669	52.2535	5.2121	23.7688	34.0686
N220cM(<1mm)	3.20513	2.95208	56.0563	5.25596	23.1262	15.6204
N230cM(<1mm)	9.38272	2.95746	56.4789	5.25494	18.6288	16.1396
N240cM(<1mm)	4.80532	2.84972	49.7183	4.9775	14.1312	10.8168
N250cM(<1mm)	9.74834	2.74198	45.2113	5.19782	13.81	11.8812
N260cM(<1mm)	7.639	2.72582	38.8732	5.18762	11.5612	6.56064
N210cM(1-1.5mm)	4.18803	3.05982	49.8592	4.76534	18.0064	56.3183
N220cM(1-1.5mm)	6.0019	3.05982	58.0282	4.74392	17.4637	43.5459
N230cM(1-1.5mm)	8.94112	3.07059	59.5775	4.71026	16.9174	49.3827
N240cM(1-1.5mm)	2.82526	3.29684	42.9577	4.64396	16.582	25.6637
N250cM(1-1.5mm)	2.63058	3.25914	41.9718	4.6613	15.8705	16.5275
N260cM(1-1.5mm)	3.8699	3.32917	35.3521	4.77146	11.373	23.5732
N210cM(1.5-2mm)	9.4207	2.9413	45.2113	4.09928	26.0345	26.6339
N220cM(1.5-2mm)	6.36752	2.93592	53.662	4.03604	25.2519	10.7993
N230cM(1.5-2mm)	5.62203	2.93592	54.6479	4.03808	22.9738	16.5899
N240cM(1.5-2mm)	4.7056	2.86588	40.5634	4.03706	17.2068	16.1165
N250cM(1.5-2mm)	3.245	2.74198	27.8873	4.0391	15.9498	11.3248
N260cM(1.5-2mm)	2.875	2.68273	21.2676	4.03706	11.464	23.9709
N310cM(<1mm)	3.47104	3.07598	42.1127	5.31104	33.7275	51.2433
N320cM(<1mm)	4.50142	3.07059	46.7606	5.30288	28.9088	21.4408
N330cM(<1mm)	4.70085	3.08136	53.3803	5.2376	25.0538	23.4375
N340cM(<1mm)	2.9962	3.51232	41.5493	5.27738	23.7688	16.1465
N350cM(<1mm)	2.5641	2.8174	31.1268	5.2784	20.235	13.6812
N360cM(<1mm)	2.145	2.68273	27.6056	5.45486	22.1625	20.8417
N310cM(1-1.5mm)	14.9858	3.3992	37.3239	5.1968	28.9289	37.1221
N320cM(1-1.5mm)	3.44729	2.96285	43.9437	5.1815	28.7074	33.6323
N330cM(1-1.5mm)	3.82241	2.95746	50.8451	5.12336	21.0937	33.7079
N340cM(1-1.5mm)	3.2716	3.34533	40	5.1866	19.4733	28.133
N350cM(1-1.5mm)	3.145	3.22143	33.9437	5.19272	18.4405	24.4253
N360cM(1-1.5mm)	2.897	3.12985	28.8732	5.2019	15.228	18.3274
N310cM(1.5-2mm)	6.16334	2.97901	33.9437	5.6048	33.4094	23.5218
N320cM(1.5-2mm)	6.47198	2.97901	41.4085	5.63744	32.1245	16.1937
N330cM(1.5-2mm)	7.16049	2.98978	45.7746	5.60072	27.2484	17.7305
N340cM(1.5-2mm)	8.52327	3.56619	39.5775	5.58032	26.8719	17.2414
N350cM(1.5-2mm)	7.963	3.34533	19.5775	5.84144	20.8255	11.1111
N360cM(1.5-2mm)	7.123	2.80124	18.5915	5.89142	15.014	8.87446
